# Supplementary material
Source: PubMed Central journal article supplement (PMC4542722)
Supplement: supp_dev183_dev183supp_table1.pdf [file supp_dev183_dev183supp_table1.pdf]

**Supplementary Table S1** Models using different population mean specific gravity (SG) to adjust for dilution of urinary bisphenol A concentrations in relation to implantation<sup>a</sup> per embryo transfer in 242 women in the Environment and Reproductive Health Study (EARTH) contributing to 337 IVF cycles.

| Urinary BPA concentration ( $\mu\text{g/l}$ ) | Unadjusted model <sup>b</sup> | Adjusted model 1                                      | Adjusted model 2                                      | Adjusted model 3                                                 |
|-----------------------------------------------|-------------------------------|-------------------------------------------------------|-------------------------------------------------------|------------------------------------------------------------------|
| Covariates                                    | –                             | Age, BMI, smoking status, race, infertility diagnosis | Age, BMI, smoking status, race, infertility diagnosis | Protocol type, number of embryo transferred and Day 3 FSH levels |
| SG <sup>c</sup>                               |                               | 1.015                                                 | 1.024                                                 | 1.024                                                            |
| Q1 [ $<\text{LOD}-0.96$ ]                     | 0.59 (0.48, 0.70)             | 0.59 (0.48, 0.70)                                     | 0.59 (0.48, 0.70)                                     | 0.69 (0.48, 0.70)                                                |
| Q2 [0.97–1.37]                                | 0.66 (0.55, 0.76)             | 0.66 (0.55, 0.76)                                     | 0.66 (0.55, 0.76)                                     | 0.65 (0.53, 0.75)                                                |
| Q3 [1.38–2.20]                                | 0.60 (0.49, 0.71)             | 0.62 (0.50, 0.72)                                     | 0.62 (0.50, 0.72)                                     | 0.60 (0.48, 0.70)                                                |
| Q4 [2.24–16.55]                               | 0.54 (0.43, 0.64)             | 0.55 (0.43, 0.66)                                     | 0.55 (0.43, 0.66)                                     | 0.57 (0.46, 0.68)                                                |
| P, trend <sup>d</sup>                         | 0.21                          | 0.32                                                  | 0.32                                                  | 0.56                                                             |

<sup>a</sup>Implantation was defined as a serum  $\beta$ -hCG level  $>6$  mIU/ml typically measured 17 days (range 15–20 days) after egg retrieval. Data are presented as rates (95% CI).

<sup>b</sup>Same results were found using a SG = 1.015 based in our study population and SG = 1.024 based in previous literature.

<sup>c</sup>Mean SG used in equation to adjust for urinary dilution (SG of 1.015 used in current analysis and 1.024 used in previous publication, Ehrlich *et al.* 2012). LOD =  $0.4 \mu\text{g/l}$ .

<sup>d</sup>Tests for trend were performed using the median concentration of urinary bisphenol A in each group as a continuous variable in the model.
