# Supplementary material
Source: PubMed Central journal article supplement (PMC4542722)
Supplement: supp_dev183_dev183supp_table2.pdf [file supp_dev183_dev183supp_table2.pdf]

**Supplementary Table SII** Effect modification of age for the association between specific gravity adjusted urinary bisphenol A concentrations and endometrial wall thickness<sup>a</sup> per initiated cycle among 256 women in the Environment and Reproductive Health Study (EARTH) contributing to 375 IVF cycles.

| Urinary BPA concentrations ( $\mu\text{g/l}$ ) | Endometrial wall thickness, mm |                     |
|------------------------------------------------|--------------------------------|---------------------|
|                                                | <37 years old                  | $\geq 37$ years old |
| Q1 [ $< \text{LOD} - 0.96$ ]                   | 9.8 (9.2, 10.3)                | 10.2 (9.5, 10.8)    |
| Q2 [0.97–1.37]                                 | 9.9 (9.3, 10.4)                | 10.7 (10.0, 11.4)   |
| Q3 [1.38–2.20]                                 | 10.9 (10.3, 11.4)              | 10.3 (9.5, 11.0)    |
| Q4 [2.24–16.55]                                | 10.5 (10.0, 11.1)              | 9.6 (8.9, 10.3)     |
| <i>P</i> , trend <sup>b</sup>                  | 0.06                           | 0.08                |
| <i>P</i> , interaction                         |                                | 0.02                |

<sup>a</sup>Data are presented as predicted marginal means (95% CI) adjusted for BMI (continuous), smoking status (never and ever), race (white and others) and infertility diagnosis (male, female and unexplained). LOD = 0.4  $\mu\text{g/l}$ .

<sup>b</sup>Tests for trend were performed using the median concentration of urinary bisphenol A in each group as a continuous variable in the model.
